# Supplementary material for: Design, synthesis, in vitro inhibition and toxicological evaluation of human carbonic anhydrases I, II and IX inhibitors in 5-nitroimidazole series
Source: PubMed Central journal article supplement (PMC6844379; doi:10.1080/14756366.2019.1685510), 2019-11-05

## Supplementary data

### <sup>1</sup>H NMR spectra of compound 4

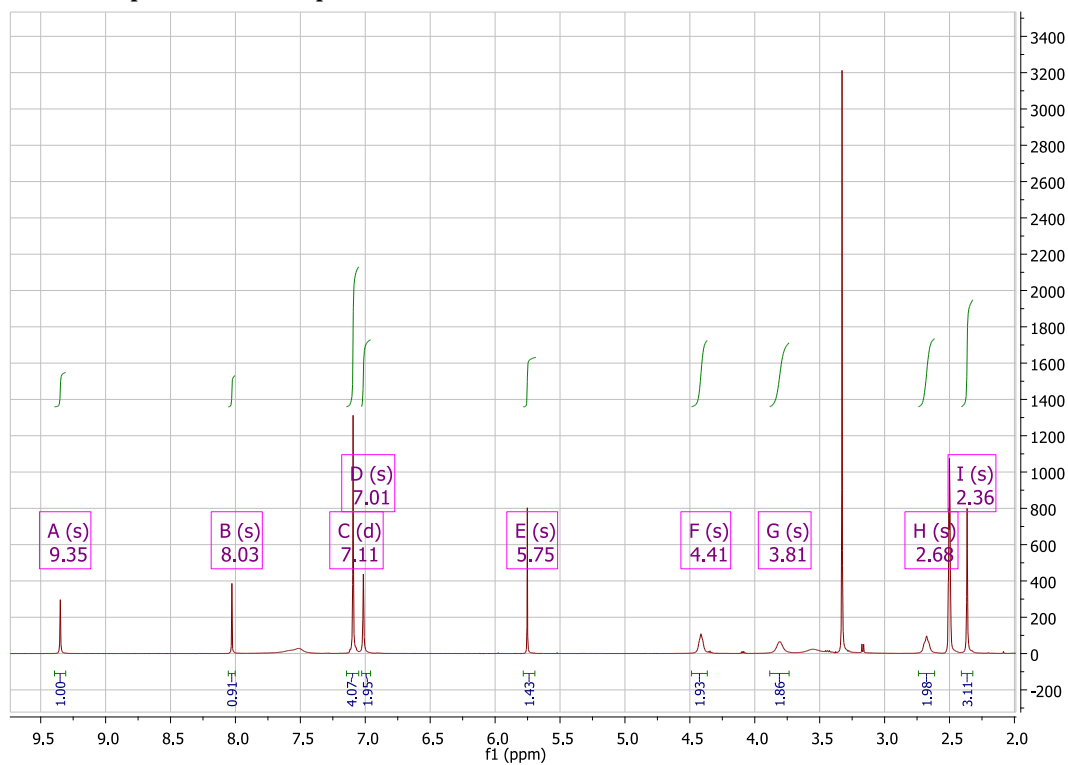

### <sup>13</sup>C NMR spectra of compound 4

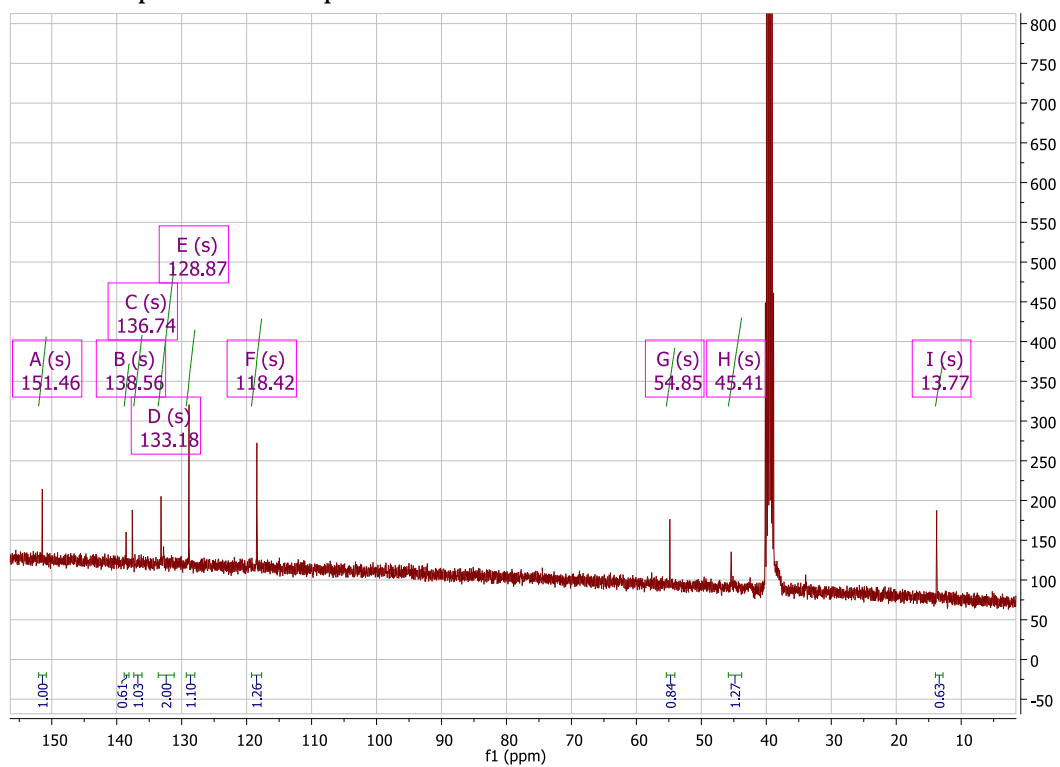

### <sup>1</sup>H NMR spectra of compound 5

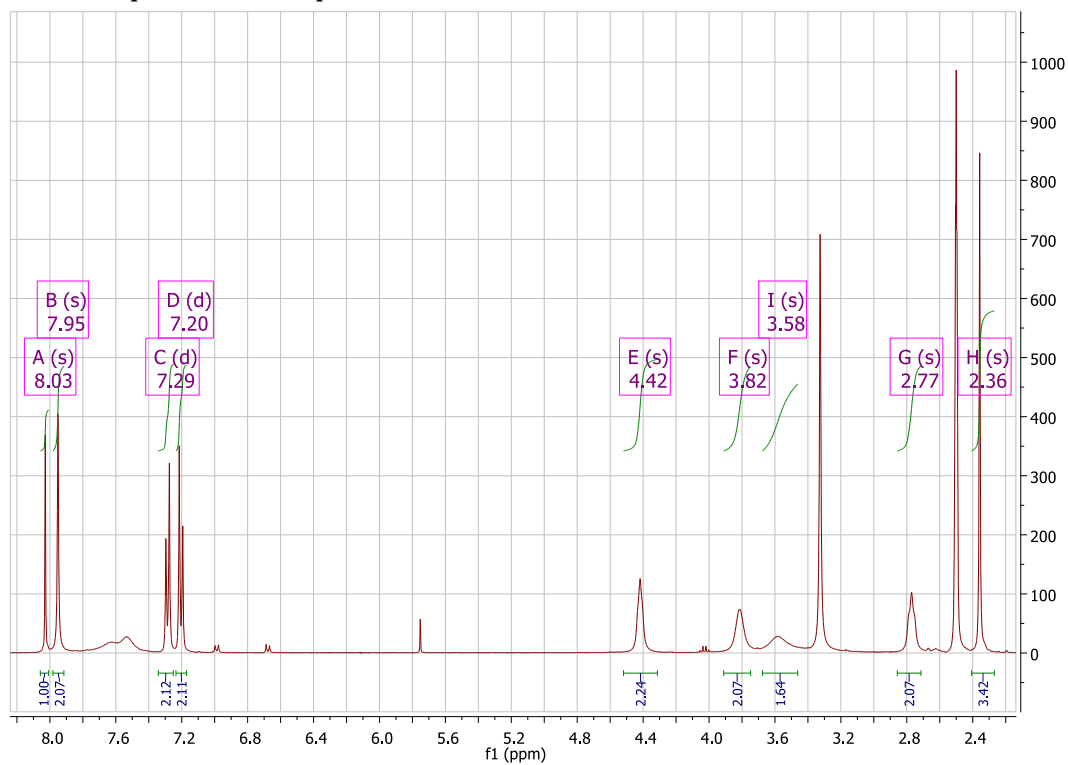

### <sup>13</sup>C NMR spectra of compound 5

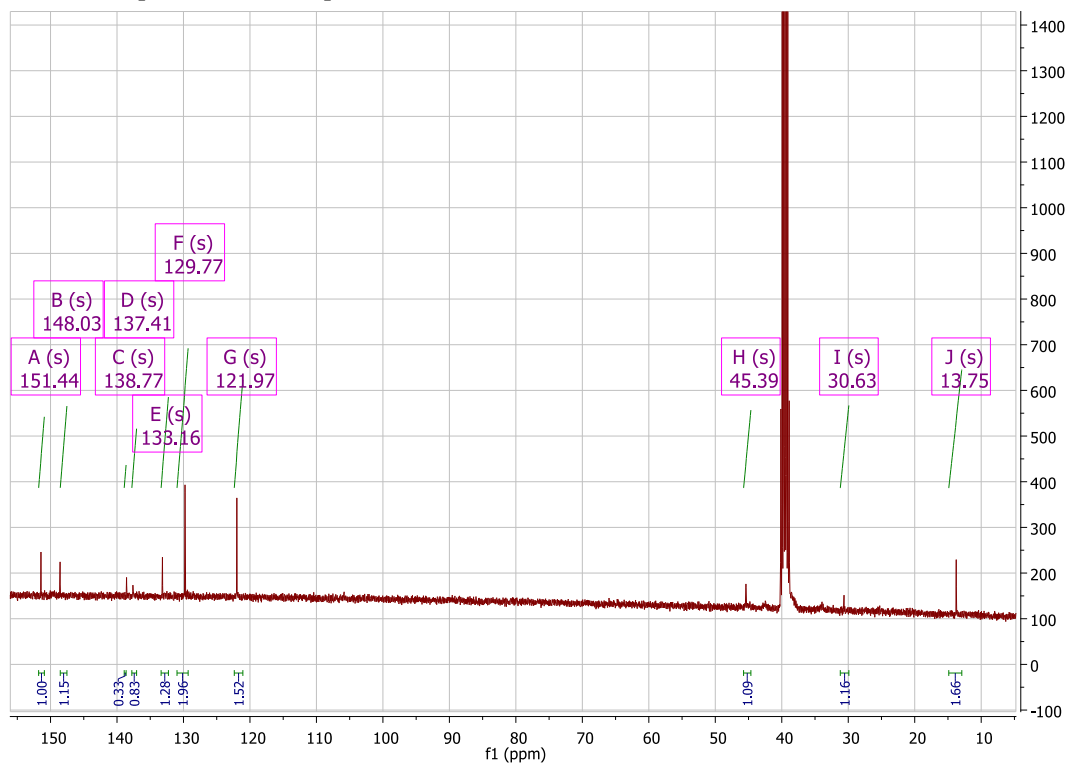

### <sup>1</sup>H NMR spectra of compound 7

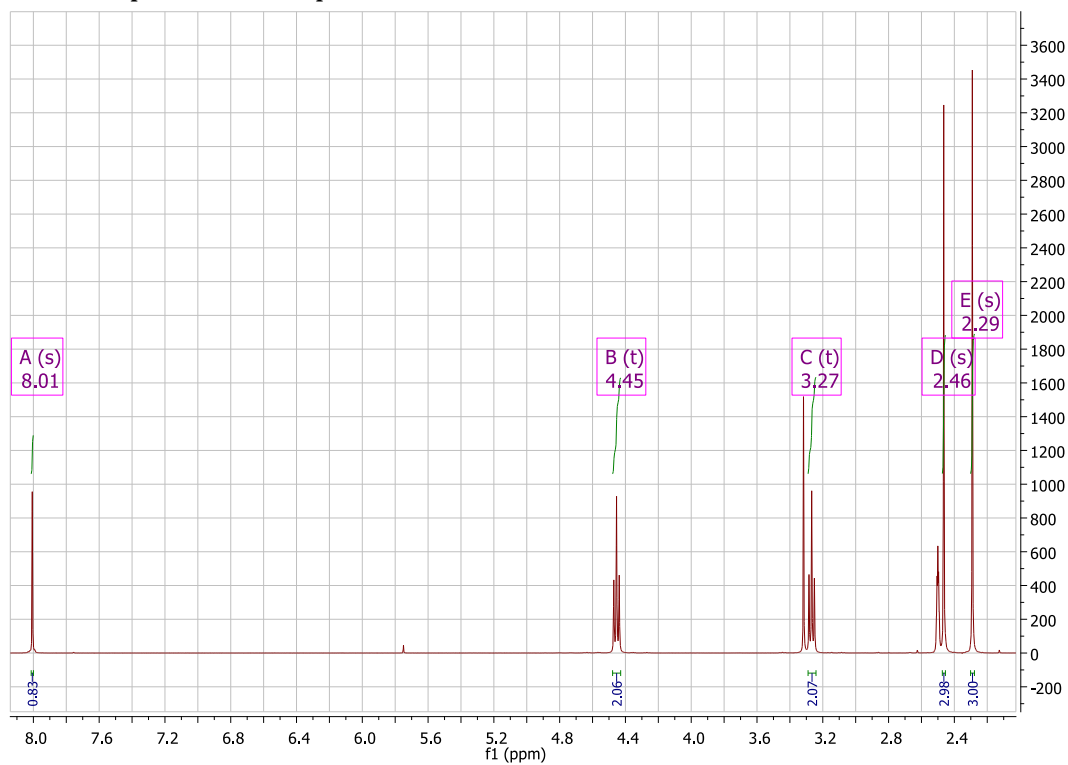

### <sup>13</sup>C NMR spectra of compound 7

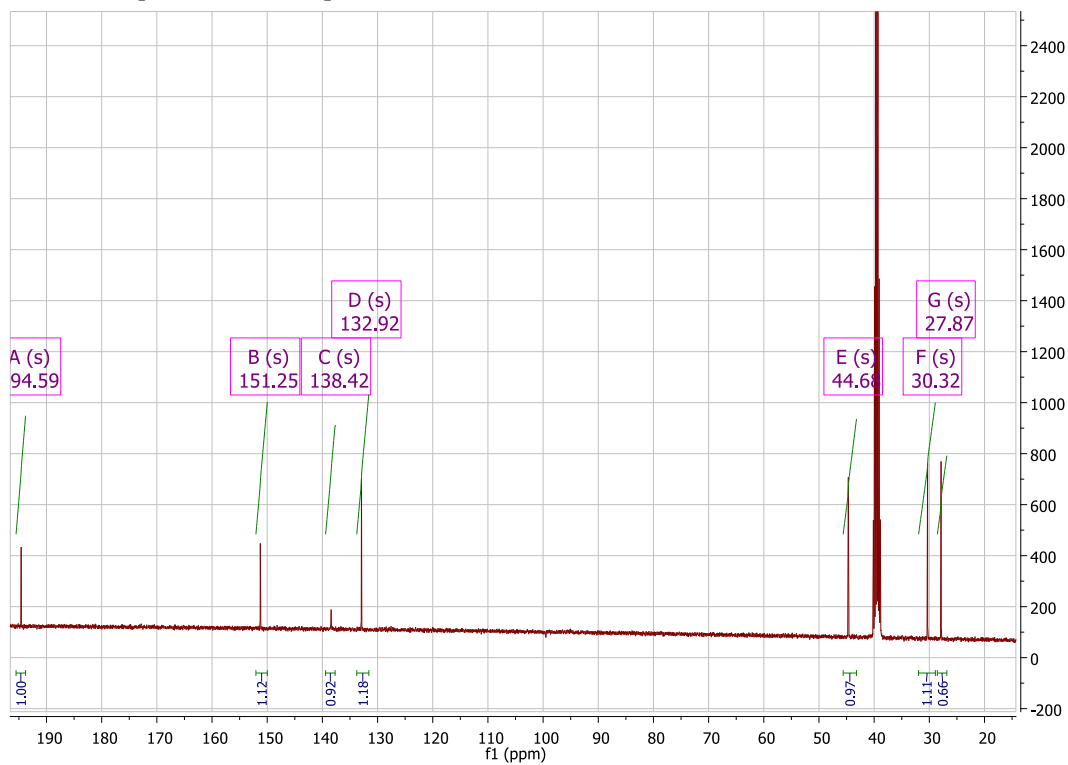

### <sup>1</sup>H NMR of spectra of compound **9**

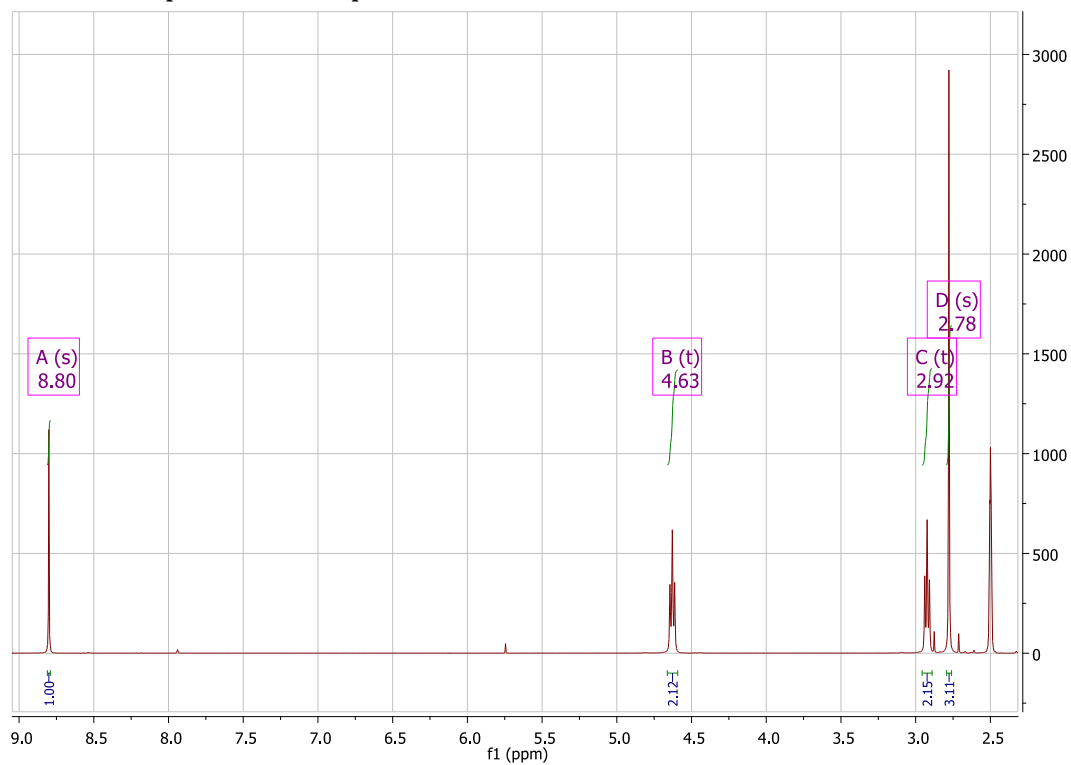

### <sup>13</sup>C NMR spectra of compound **9**

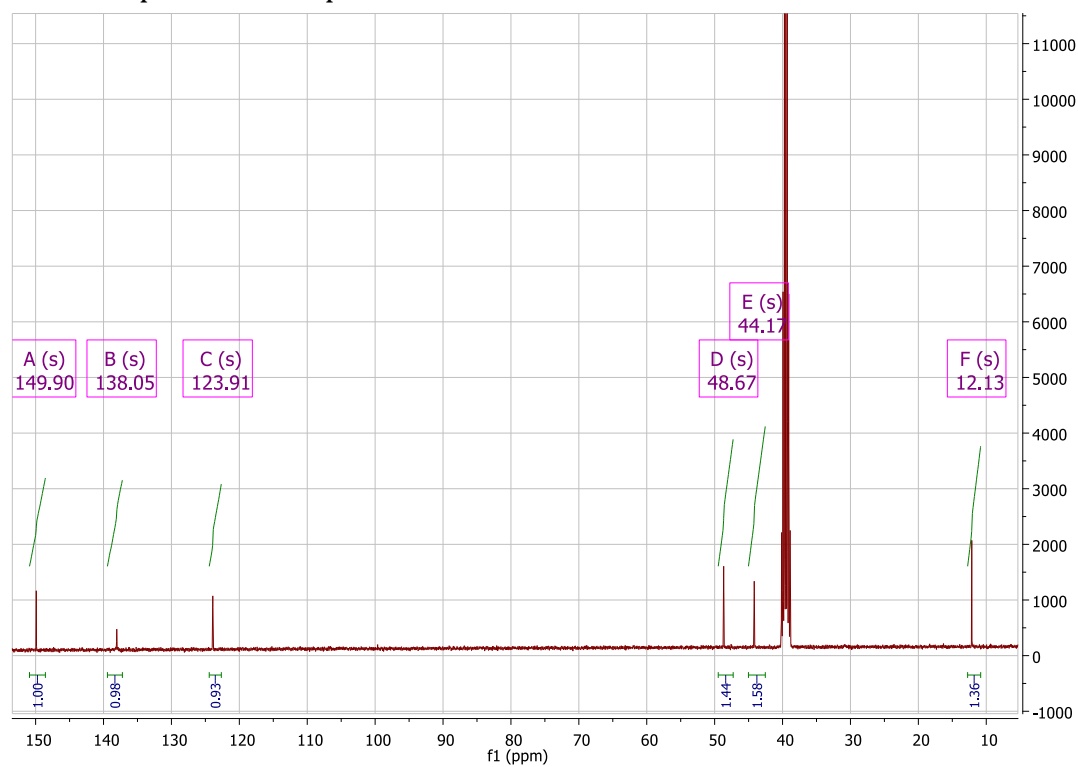

### <sup>1</sup>H NMR spectra of compound **10**

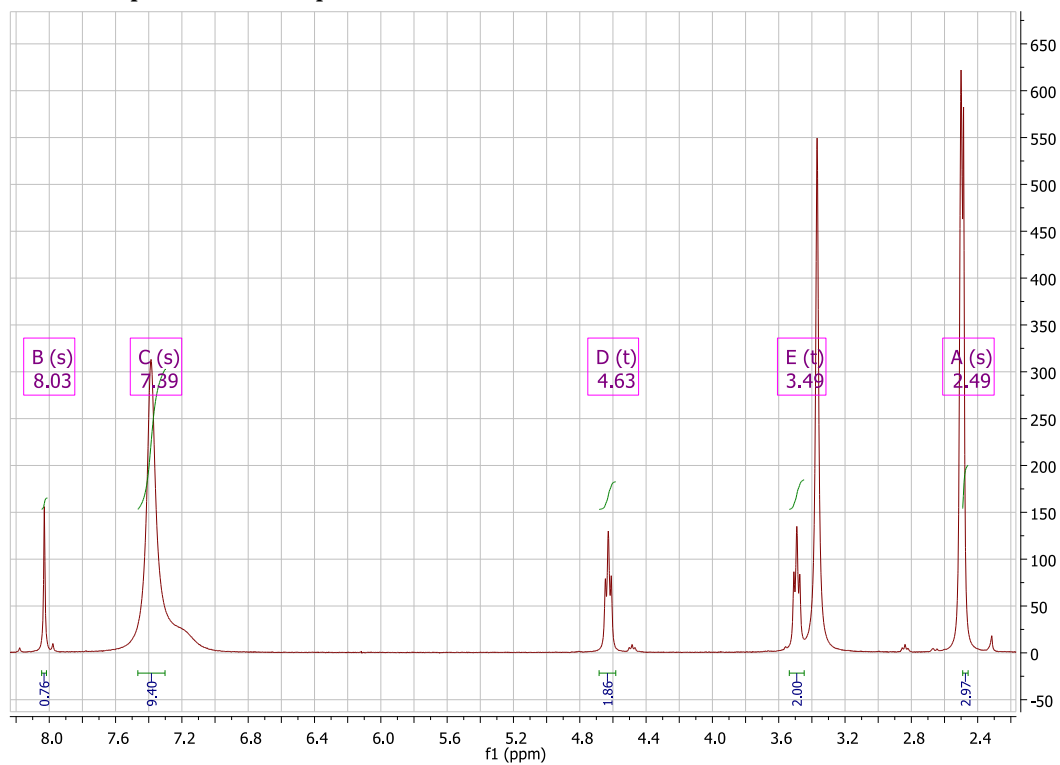

### <sup>13</sup>C NMR spectra of compound **10**

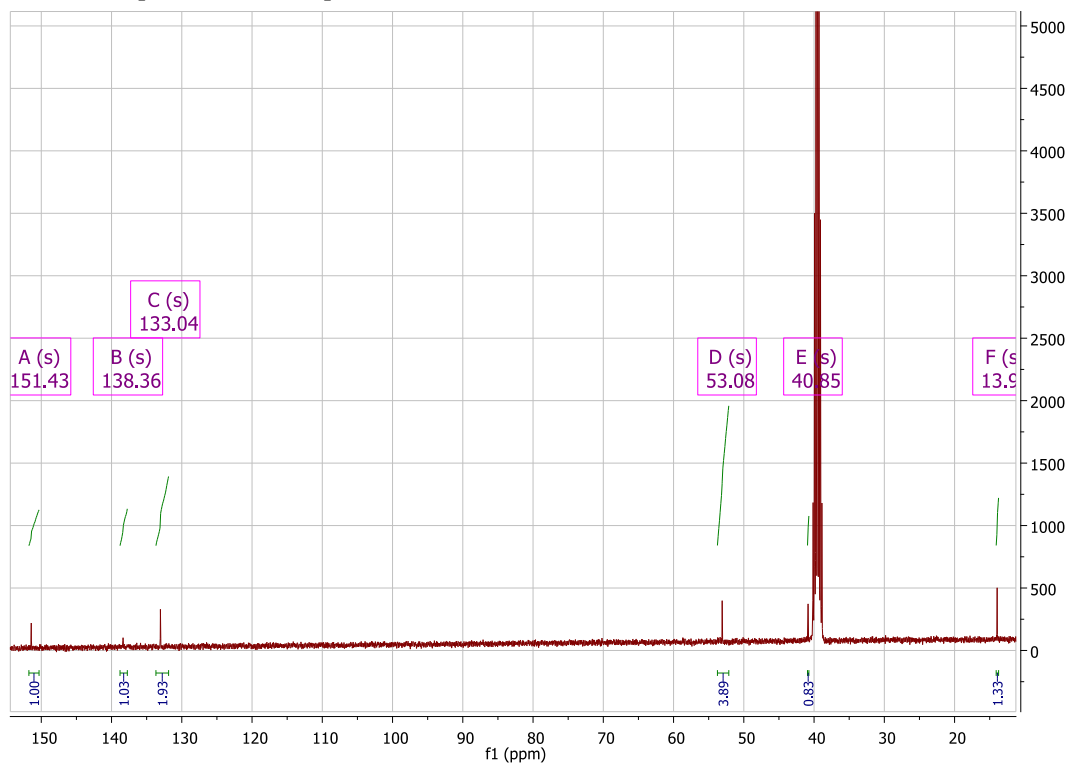

Supplement: IENZ_A_1685510_SM6169.pdf [file IENZ_A_1685510_SM6169.pdf]
